# Supplementary material for: Closed-Loop Control Better than Open-Loop Control of Profofol TCI Guided by BIS: A Randomized, Controlled, Multicenter Clinical Trial to Evaluate the CONCERT-CL Closed-Loop System
Source: PubMed Central journal article supplement (PMC4401751; doi:10.1371/journal.pone.0123862), 2015-04-17
Supplement: pone.0123862.s006.pdf [file pone.0123862.s006.pdf]

# BIS闭环数据分析报告

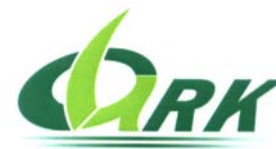

注射信息:

|               |                |
|---------------|----------------|
| 日期: 2013/1/11 | 开始时间: 12:08:11 |
| 病例号: 000114   | 体重: 66 kg      |
| 年龄: 39        | 性别: 女          |

趋势图:

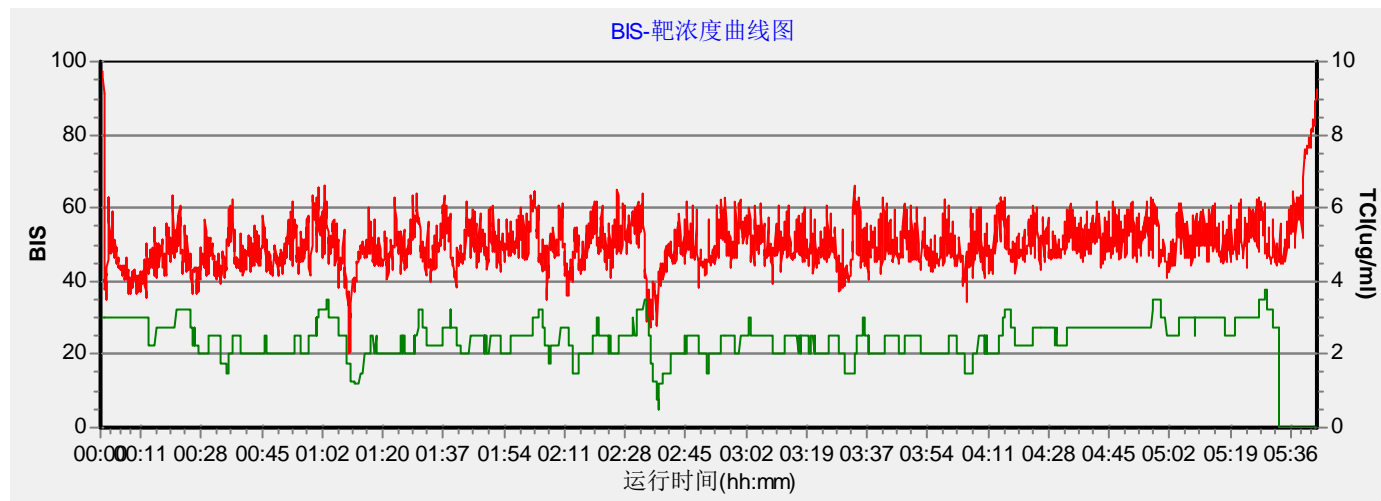

数据分析结果:

|                    |                    |                  |
|--------------------|--------------------|------------------|
|                    | 诱导期数据              |                  |
| A通道起始靶浓度:3.0ug/ml  | B通道起始靶浓度:4.0ng/ml  |                  |
| 诱导时间:98秒           | BIS<40(3min):0秒    | BIS>60(3min):15秒 |
|                    | 维持阶段数据             |                  |
| 麻醉维持时间:331分钟       |                    |                  |
| 区间百分比(40-60):91.4% | 区间百分比(<40): 3.4%   | 区间百分比(>60): 5.2% |
| 丙泊酚总量:1889.26 mg   |                    |                  |
| 5.18 mg/kg/h       | 调整次数:166(30.02次/h) | 平均靶浓度:2.4        |
| 瑞芬总量:4720.76 ug    |                    |                  |
| 12.93 ug/kg/h      | 调整次数:9(1.63次/h)    | 平均靶浓度:5.8        |
| BIS最大值:66.1        | BIS最小值:20.2        | BIS平均值:49.7      |
| PE:-0.64           |                    |                  |
| MDPE:-1.80         | MDAPE:7.40         | Wobble:7.20      |
| GS:15.98           |                    |                  |
|                    |                    |                  |
|                    |                    |                  |
|                    |                    |                  |
