# Supplementary material for: Closed-Loop Control Better than Open-Loop Control of Profofol TCI Guided by BIS: A Randomized, Controlled, Multicenter Clinical Trial to Evaluate the CONCERT-CL Closed-Loop System
Source: PubMed Central journal article supplement (PMC4401751; doi:10.1371/journal.pone.0123862), 2015-04-17
Supplement: pone.0123862.s007.pdf [file pone.0123862.s007.pdf]

# BIS闭环数据分析报告

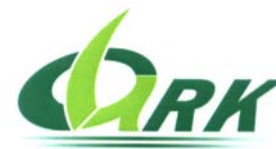

注射信息:

|               |                |
|---------------|----------------|
| 日期: 2013/1/18 | 开始时间: 09:14:07 |
| 病例号: 000121   | 体重: 49 kg      |
| 年龄: 54        | 性别: 女          |

趋势图:

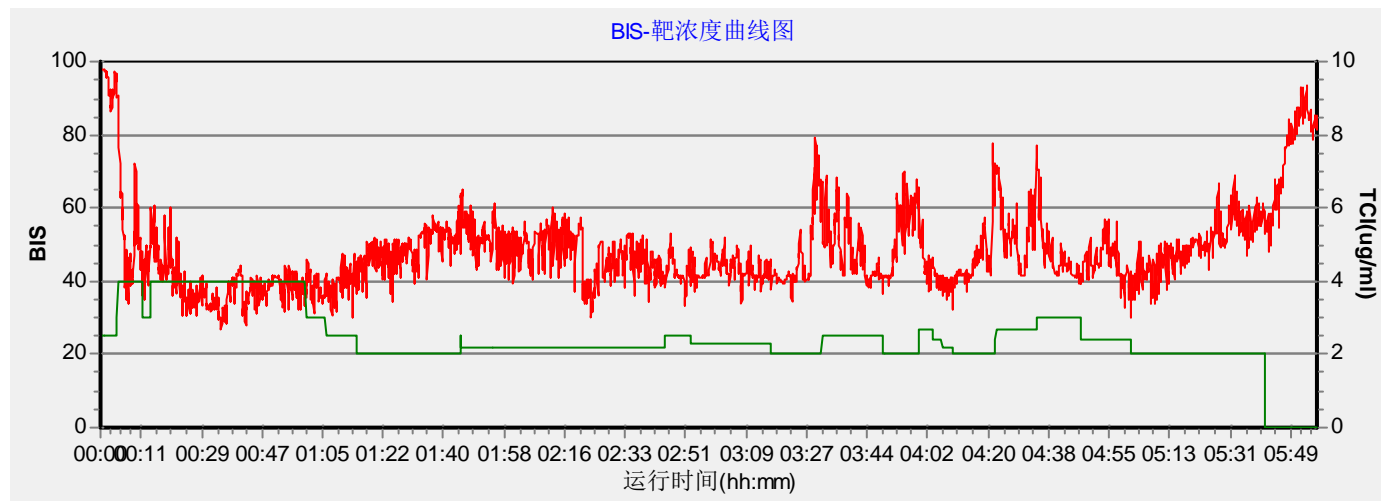

数据分析结果:

|                    |                   |                  |
|--------------------|-------------------|------------------|
|                    | 诱导期数据             |                  |
| A通道起始靶浓度:2.5ug/ml  | B通道起始靶浓度:4.0ng/ml |                  |
| 诱导时间:434秒          | BIS<40(3min):55秒  | BIS>60(3min):5秒  |
|                    | 维持阶段数据            |                  |
| 麻醉维持时间:334分钟       |                   |                  |
| 区间百分比(40-60):77.0% | 区间百分比(<40):18.1%  | 区间百分比(>60): 4.9% |
| 丙泊酚总量:1357.19 mg   |                   |                  |
| 4.97 mg/kg/h       | 调整次数:21(3.77次/h)  | 平均靶浓度:2.5        |
| 瑞芬总量:4582.66 ug    |                   |                  |
| 16.79 ug/kg/h      | 调整次数:9(1.62次/h)   | 平均靶浓度:6.7        |
| BIS最大值:79.1        | BIS最小值:27.0       | BIS平均值:46.2      |
| PE:-7.65           |                   |                  |
| MDPE:-10.40        | MDAPE:13.60       | Wobble:9.60      |
| GS:30.11           |                   |                  |
|                    |                   |                  |
|                    |                   |                  |
|                    |                   |                  |
